# Supplementary material
Source: PubMed Central journal article supplement (PMC9401523)
Supplement: 10780432ccr211819-sup-265977_2_supp_7300653_qxrbrz.pdf [file 10780432ccr211819-sup-265977_2_supp_7300653_qxrbrz.pdf]

Supplementary Figure 1. Study Schema

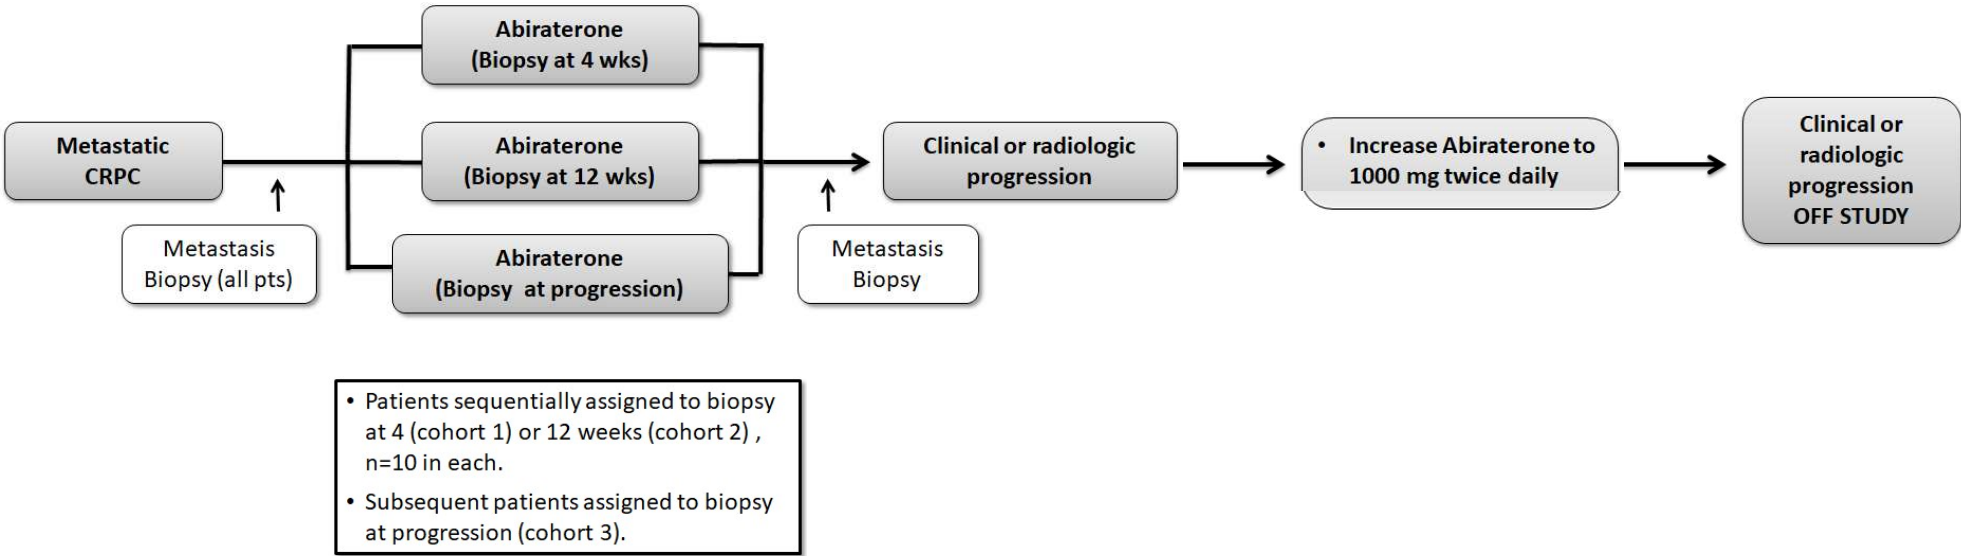

**Supplemental Figure 1. Study Schema and Sample Collection and Processing.** Blood was drawn at baseline, and at 4, 8, and 12 weeks and at progression for assessment of steroid and drug levels. In patients who underwent escalation of AA to 2000mg, blood was also drawn at 4 weeks after dose increase and at time of second progression. Blood was separately processed to obtain buffy coat and serum by standard methods and all samples were frozen at -80 degrees. Core biopsies of tumor metastases were obtained at baseline in all patients, after 4 weeks of therapy (cohort 1), 12 weeks (cohort 2), or at progression (cohort 3). In all cases except one, the second biopsy was performed from the same metastatic site that was sampled at baseline. Tissue cores were immediately snap frozen in liquid nitrogen and maintained at -80 degrees. All serum, buffy coat and tissue samples were batched and then thawed and assayed for androgens or sequencing after completion of the study.

Supplementary Figure 2. Additional Mass Spectrometry Methods

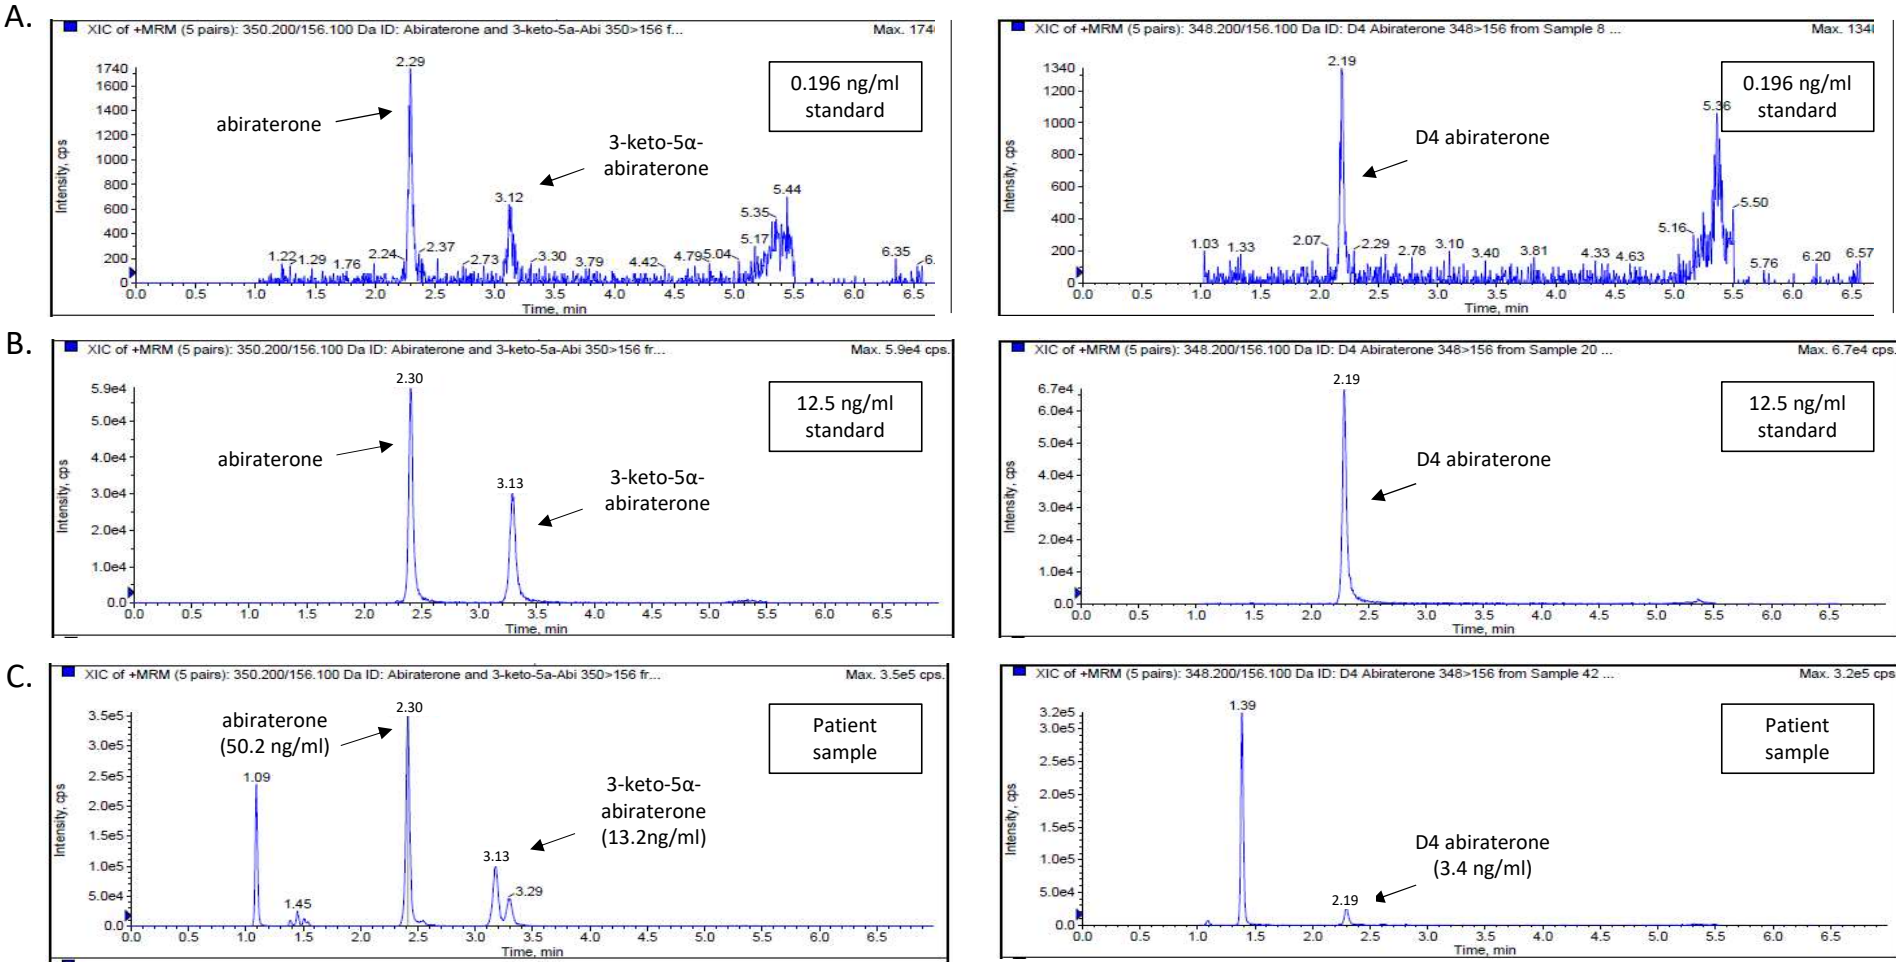

**Supplementary Figure 2. Additional Mass Spectrometry Methods.** Chromatograms showing the peak and retention times for the Abiraterone, D4 abiraterone and 3-keto-5 $\alpha$ -abiraterone standards at **A.** 0.196 ng/ml and **B.** 12.5ng/ml. Analytes were detected using multiple reaction monitoring (MRM), at a characteristic ion dissociation transition of m/z 350.00  $\rightarrow$  156 for abiraterone and 3-keto-5 $\alpha$ -abiraterone, and 348.00  $\rightarrow$  155 for D4 abiraterone. **C.** Representative patient sample with chromatograms for intermediate concentrations of each analyte.

Lower limits of detection and quantitation (LLOD and LLOQ) for steroids in serum were 0.002 ng/ml for AED, testosterone; 0.005 ng/ml for progesterone, pregnenolone, androsterone, DHEA; 0.01 ng/ml for dihydrotestosterone (DHT); and 0.6 ng/ml for DHEAS. The LLOD and LLOQ for steroids in tissue were 0.49 pg/sample (0.01 pg/mg) for AED, testosterone 0.98 pg/sample (0.02 pg/mg) for progesterone, androsterone; 1.96 pg/sample (0.04 pg/mg) for pregnenolone; 3.9 pg/sample (0.08 pg/mg) for DHT; 31.2 pg/sample (0.8 pg/mg) for DHEA; and 98 pg/sample (2.0 pg/mg) for DHEAS. For DHEAS only, a low standard curve was used for the post-treatment tissue samples with LLOD and LLOQ set at 0.38 pg/sample (0.01 pg/mg). Of note, while true peaks were visible for the reported data points, the accuracy of the measurements is uncertain as the recovery of DHEAS (based on the internal standard) was <10% in this assay. The LLOD and LLOQ for abiraterone, D4-abiraterone, and 3-keto-5 $\alpha$ -abiraterone was 0.20 ng/ml in serum and 0.078 ng/sample (1.6 pg/mg) in tissue.

Supplementary Table 1. Serum and Tissue Steroid Levels prior to Abiraterone Acetate and Prednisone Therapy

| Serum at baseline      | PSA (ng/dl) | Preg (ng/ml) | Prog (ng/ml) | DHEAS (ng/ml) | DHEA (ng/ml) | AED (ng/ml)  | ASD (ng/ml)   | T (ng/ml)    | DHT (pg/ml)  |
|------------------------|-------------|--------------|--------------|---------------|--------------|--------------|---------------|--------------|--------------|
| Mean                   | <b>142</b>  | <b>0.287</b> | <b>0.023</b> | <b>646</b>    | <b>1.14</b>  | <b>0.358</b> | <b>0.0461</b> | <b>0.069</b> | <b>0.017</b> |
| Median                 | <b>78.0</b> | <b>0.263</b> | <b>0.019</b> | <b>502</b>    | <b>0.793</b> | <b>0.307</b> | <b>0.046</b>  | <b>0.067</b> | <b>0.013</b> |
| Minimum                | 2.0         | 0.037        | 0.005        | 36            | 0.083        | 0.019        | 0.005         | 0.006        | 0.010        |
| Maximum                | 908.0       | 0.894        | 0.068        | 2659          | 3.510        | 0.954        | 0.128         | 0.187        | 0.052        |
| Lower 95% CI of median | 30.0        | 0.161        | 0.014        | 230           | 0.460        | 0.234        | 0.024         | 0.047        | 0.010        |
| Upper 95% CI of median | 162.0       | 0.357        | 0.022        | 895           | 1.650        | 0.439        | 0.066         | 0.089        | 0.019        |

| Tissue at first biopsy (pg/mg) | Preg        | Prog         | DHEAS       | AED          | ASD          | T            | DHT*        |
|--------------------------------|-------------|--------------|-------------|--------------|--------------|--------------|-------------|
| Mean                           | <b>17.6</b> | <b>0.234</b> | <b>71.3</b> | <b>0.148</b> | <b>0.053</b> | <b>0.167</b> | <b>0.17</b> |
| Median                         | <b>12.7</b> | <b>0.10</b>  | <b>47.8</b> | <b>0.117</b> | <b>0.035</b> | <b>0.055</b> | <b>0.08</b> |
| Minimum                        | 4.42        | 0.02         | 2.0         | 0.01         | 0.019        | 0.01         | 0.08        |
| Maximum                        | 78.1        | 2.19         | 340         | 0.534        | 0.215        | 1.16         | 0.88        |
| Lower 95% CI of median         | 9.64        | 0.065        | 18.7        | 0.071        | 0.02         | 0.03         |             |
| Upper 95% CI of median         | 19.1        | 0.224        | 88.4        | 0.234        | 0.049        | 0.175        |             |

\*DHT was below the limit of quantitation (0.08 pg/mg) in 25 of 29 samples

Supplementary Table 2. Serum and Tissue Steroid Levels on Abiraterone Acetate and Prednisone Therapy

| Serum (ng/ml)          |              | d0            | wk4           | wk8           | wk12          | EOS           |
|------------------------|--------------|---------------|---------------|---------------|---------------|---------------|
| Mean                   | Preg         | <b>0.287</b>  | <b>2.27</b>   | <b>2.77</b>   | <b>2.36</b>   | <b>1.97</b>   |
| Median                 | Preg         | <b>0.263</b>  | <b>0.719</b>  | <b>0.97</b>   | <b>1.56</b>   | <b>0.90</b>   |
| Minimum                | Preg         | 0.037         | 0.142         | 0.112         | 0.30          | 0.113         |
| Maximum                | Preg         | 0.894         | 11.70         | 25.42         | 7.97          | 9.08          |
| Lower 95% CI of median | Preg         | 0.161         | 0.461         | 0.421         | 0.886         | 0.534         |
| Upper 95% CI of median | Preg         | 0.357         | 4.17          | 2.275         | 2.775         | 1.605         |
|                        |              |               |               |               |               |               |
| Mean                   | DHEAS        | <b>646</b>    | <b>3.52</b>   | <b>3.66</b>   | <b>2.84</b>   | <b>2.68</b>   |
| Median                 | DHEAS        | <b>502</b>    | <b>1.80</b>   | <b>1.20</b>   | <b>2.40</b>   | <b>0.80</b>   |
| Minimum                | DHEAS        | 36            | 0.60          | 0.60          | 0.60          | 0.60          |
| Maximum                | DHEAS        | 2659          | 15.6          | 20.8          | 11.6          | 20.0          |
| Lower 95% CI of median | DHEAS        | 230           | 0.90          | 0.80          | 0.90          | 0.60          |
| Upper 95% CI of median | DHEAS        | 895           | 4.60          | 3.00          | 3.70          | 2.40          |
|                        |              |               |               |               |               |               |
| Mean                   | DHEA         | <b>1.14</b>   | <b>0.009</b>  | <b>0.0136</b> | <b>0.013</b>  | <b>0.015</b>  |
| Median                 | DHEA         | <b>0.793</b>  | <b>0.007</b>  | <b>0.008</b>  | <b>0.009</b>  | <b>0.005</b>  |
| Minimum                | DHEA         | 0.083         | 0.005         | 0.005         | 0.005         | 0.005         |
| Maximum                | DHEA         | 3.510         | 0.031         | 0.038         | 0.052         | 0.179         |
| Lower 95% CI of median | DHEA         | 0.460         | 0.005         | 0.005         | 0.005         | 0.005         |
| Upper 95% CI of median | DHEA         | 1.650         | 0.010         | 0.017         | 0.017         | 0.009         |
|                        |              |               |               |               |               |               |
| Mean                   | AED          | <b>0.358</b>  | <b>0.003</b>  | <b>0.003</b>  | <b>0.005</b>  | <b>0.005</b>  |
| Median                 | AED          | <b>0.307</b>  | <b>0.002</b>  | <b>0.002</b>  | <b>0.002</b>  | <b>0.002</b>  |
| Minimum                | AED          | 0.019         | 0.002         | 0.002         | 0.002         | 0.002         |
| Maximum                | AED          | 0.954         | 0.008         | 0.013         | 0.029         | 0.031         |
| Lower 95% CI of median | AED          | 0.234         | 0.002         | 0.002         | 0.002         | 0.002         |
| Upper 95% CI of median | AED          | 0.439         | 0.003         | 0.003         | 0.003         | 0.003         |
|                        |              |               |               |               |               |               |
| Mean                   | Testosterone | <b>0.0691</b> | <b>0.0024</b> | <b>0.0026</b> | <b>0.0028</b> | <b>0.0028</b> |
| Median                 | Testosterone | <b>0.0672</b> | <b>0.0024</b> | <b>0.0024</b> | <b>0.0024</b> | <b>0.0024</b> |
| Minimum                | Testosterone | 0.0064        | 0.0024        | 0.0024        | 0.0024        | 0.0024        |
| Maximum                | Testosterone | 0.1873        | 0.0024        | 0.0054        | 0.0060        | 0.0075        |
| Lower 95% CI of median | Testosterone | 0.0466        | 0.0024        | 0.0024        | 0.0024        | 0.0024        |
| Upper 95% CI of median | Testosterone | 0.0898        | 0.0024        | 0.0024        | 0.0024        | 0.0024        |

| Tissue Biopsies (pg/mg) |          | bx1          | bx2          | 4wk bx       | 12wk bx      | EOS bx       |
|-------------------------|----------|--------------|--------------|--------------|--------------|--------------|
| Mean                    | Preg     | <b>17.6</b>  | <b>39.6</b>  | <b>27</b>    | <b>32.6</b>  | <b>59.8</b>  |
| Median                  | Preg     | <b>12.7</b>  | <b>22.9</b>  | <b>26.2</b>  | <b>14.2</b>  | <b>34.1</b>  |
| Minimum                 | Preg     | 4.42         | 4.56         | 4.56         | 6.68         | 8.56         |
| Maximum                 | Preg     | 78.2         | 176          | 71.7         | 102          | 176          |
| Lower 95% CI of median  | Preg     | 9.64         | 11.7         | 9.44         | 6.68         | 8.56         |
| Upper 95% CI of median  | Preg     | 19.1         | 46.6         | 37.8         | 102          | 176          |
|                         |          |              |              |              |              |              |
| Mean                    | DHEAS    | <b>71.2</b>  | <b>0.83</b>  | <b>0.61</b>  | <b>0.55</b>  | <b>1.27</b>  |
| Median                  | DHEAS    | <b>47.8</b>  | <b>0.37</b>  | <b>0.55</b>  | <b>0.49</b>  | <b>0.01</b>  |
| Minimum                 | DHEAS    | 2.0          | 0.01         | 0.01         | 0.01         | 0.01         |
| Maximum                 | DHEAS    | 340          | 9.04         | 1.52         | 1.56         | 9.04         |
| Lower 95% CI of median  | DHEAS    | 18.70        | 0.01         | 0.01         | 0.01         | 0.01         |
| Upper 95% CI of median  | DHEAS    | 88.40        | 0.81         | 1.38         | 1.56         | 1.42         |
|                         |          |              |              |              |              |              |
| Mean                    | AED      | <b>0.148</b> | <b>0.010</b> | <b>0.010</b> | <b>0.010</b> | <b>0.014</b> |
| Median                  | AED      | <b>0.117</b> | <b>0.010</b> | <b>0.010</b> | <b>0.010</b> | <b>0.010</b> |
| Minimum                 | AED      | 0.010        | 0.010        | 0.010        | 0.010        | 0.010        |
| Maximum                 | AED      | 0.534        | 0.039        | 0.010        | 0.010        | 0.039        |
| Lower 95% CI of median  | AED      | 0.071        | 0.010        | 0.010        | 0.010        | 0.010        |
| Upper 95% CI of median  | AED      | 0.234        | 0.010        | 0.010        | 0.010        | 0.039        |
|                         |          |              |              |              |              |              |
| Mean                    | Testost. | <b>0.156</b> | <b>0.011</b> | <b>0.011</b> | <b>0.011</b> | <b>0.011</b> |
| Median                  | Testost. | <b>0.046</b> | <b>0.010</b> | <b>0.010</b> | <b>0.010</b> | <b>0.010</b> |
| Minimum                 | Testost. | 0.010        | 0.010        | 0.010        | 0.010        | 0.010        |
| Maximum                 | Testost. | 1.15         | 0.019        | 0.017        | 0.015        | 0.019        |
| Lower 95% CI of median  | Testost. | 0.012        | 0.010        | 0.010        | 0.010        | 0.010        |
| Upper 95% CI of median  | Testost. | 0.168        | 0.010        | 0.010        | 0.015        | 0.019        |

### Supplementary Figure 3. Survival by PSA Decline

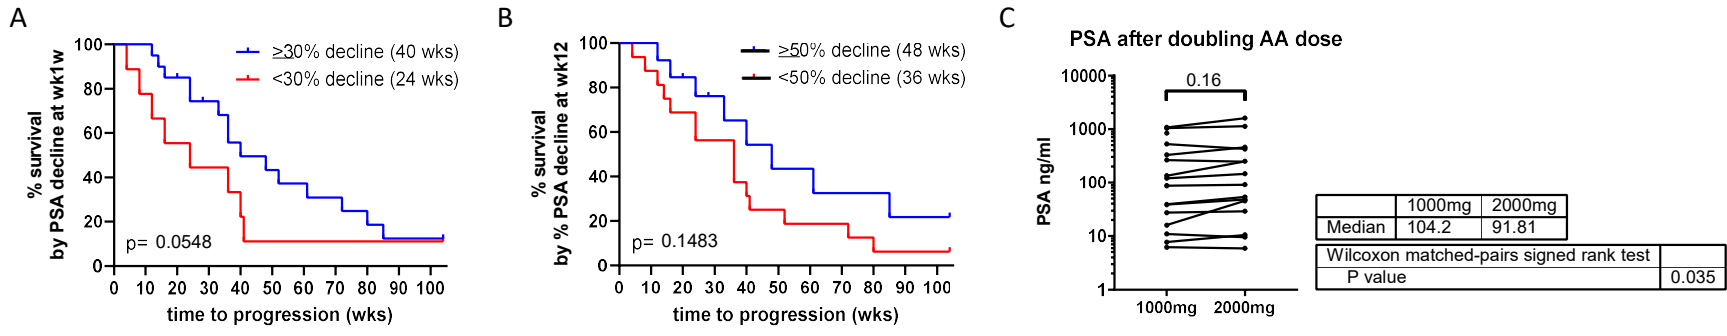

Supplementary Figure 3. Kaplan Meier plot of time to radiographic progression on standard dose abiraterone acetate (AA) as a function of achieving **A.** 30% PSA decline or **B.** 50% PSA decline at 12 weeks. **C.** PSA change one month after doubling dose of AA to 2000mg daily.

Supplementary Figure 4. The Steroid Metabolic Pathway

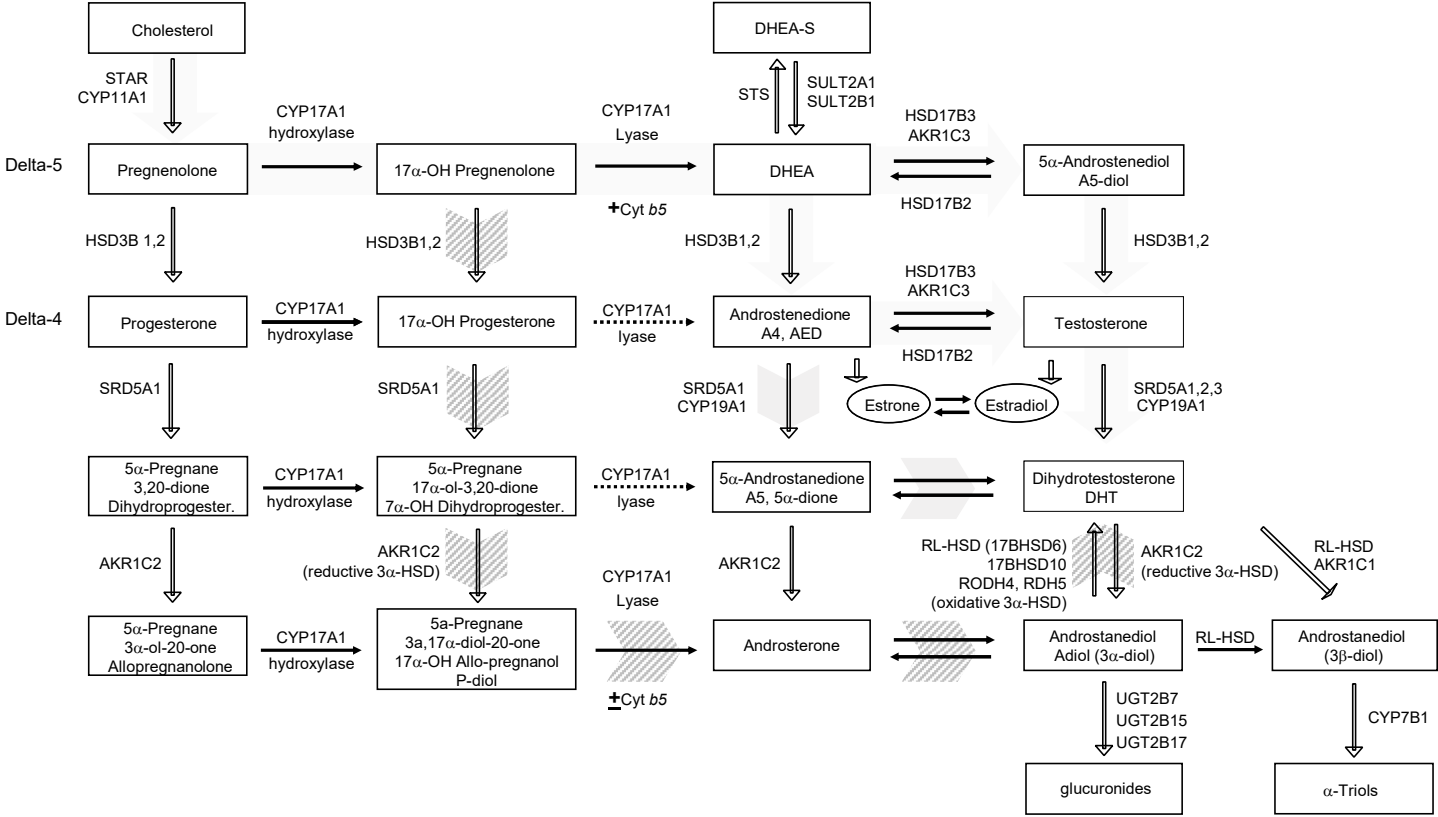

Supplementary Table 3. Levels of Abiraterone and Metabolites in Serum and Tissue

| Abiraterone and Metabolites |          | 4wk         | 8wk         | 12wk        | EOS         |                                             | 4wk         | 8wk         | 12wk        | EOS         |
|-----------------------------|----------|-------------|-------------|-------------|-------------|---------------------------------------------|-------------|-------------|-------------|-------------|
|                             |          |             |             |             |             | <b>Serum (ng/ml)</b>                        |             |             |             |             |
| Mean                        | Abi      | <b>54.5</b> | <b>60.4</b> | <b>50.2</b> | <b>77</b>   |                                             | <b>279</b>  | <b>216</b>  | <b>107</b>  | <b>533</b>  |
| Median                      | Abi      | <b>34.8</b> | <b>31.1</b> | <b>30.9</b> | <b>29.8</b> |                                             | <b>182</b>  | <b>170</b>  | <b>60.4</b> | <b>622</b>  |
| Minimum                     | Abi      | 2.75        | 3.57        | 2.25        | 2.27        |                                             | 26.6        | 59.2        | 26.6        | 35.9        |
| Maximum                     | Abi      | 275         | 288         | 228         | 361         |                                             | 1036        | 789         | 305         | 1036        |
| Lower 95% CI of median      | Abi      | 18.4        | 24.8        | 13.2        | 20.1        |                                             | 83.7        | 84.9        | 26.6        | 35.9        |
| Lower 95% CI of median      | Abi      | 88          | 53          | 54.2        | 59.8        |                                             | 267         | 252         | 305         | 1036        |
|                             |          |             |             |             |             | <b>2<sup>nd</sup> Tissue biopsy (pg/mg)</b> |             |             |             |             |
| Mean                        | D4 Abi   | <b>2.4</b>  | <b>2.8</b>  | <b>2.0</b>  | <b>2.9</b>  |                                             | <b>6.9</b>  | <b>4.9</b>  | <b>2.3</b>  | <b>11.6</b> |
| Median                      | D4 Abi   | <b>1.8</b>  | <b>1.6</b>  | <b>1.4</b>  | <b>1.6</b>  |                                             | <b>1.6</b>  | <b>1.6</b>  | <b>1.6</b>  | <b>1.6</b>  |
| Minimum                     | D4 Abi   | 0.5         | 0.3         | 0.2         | 0.2         |                                             | 1.6         | 1.6         | 1.6         | 1.6         |
| Maximum                     | D4 Abi   | 10.0        | 14.2        | 8.8         | 13.1        |                                             | 32.7        | 17.2        | 5.9         | 32.7        |
| Lower 95% CI of median      | D4 Abi   | 0.8         | 1.2         | 0.9         | 1.1         |                                             | 1.6         | 1.6         | 1.6         | 1.6         |
| Lower 95% CI of median      | D4 Abi   | 2.6         | 2.5         | 2.2         | 2.8         |                                             | 5.3         | 10.2        | 5.9         | 32.1        |
|                             |          |             |             |             |             | <b>Serum (ng/ml)</b>                        |             |             |             |             |
| Mean                        | Keto-Abi | <b>9.2</b>  | <b>11.4</b> | <b>11.2</b> | <b>11.9</b> |                                             | <b>40.5</b> | <b>23.0</b> | <b>27.9</b> | <b>71.3</b> |
| Median                      | Keto-Abi | <b>9.4</b>  | <b>10.0</b> | <b>8.6</b>  | <b>10.0</b> |                                             | <b>14.6</b> | <b>10.2</b> | <b>7.8</b>  | <b>24.8</b> |
| Minimum                     | Keto-Abi | 1.0         | 1.5         | 0.5         | 1.1         |                                             | 1.6         | 1.6         | 2.4         | 4.0         |
| Maximum                     | Keto-Abi | 25.6        | 50.8        | 29.5        | 48.0        |                                             | 349.4       | 76.4        | 72.8        | 349.4       |
| Lower 95% CI of median      | Keto-Abi | 5.4         | 5.2         | 3.8         | 3.7         |                                             | 6.7         | 1.6         | 2.4         | 4.0         |
| Lower 95% CI of median      | Keto-Abi | 10.6        | 11.7        | 17.8        | 15.4        |                                             | 46.5        | 65.1        | 72.8        | 349.4       |



Supplementary Figure 5. Serum and Tissue Levels of Abiraterone and Metabolites

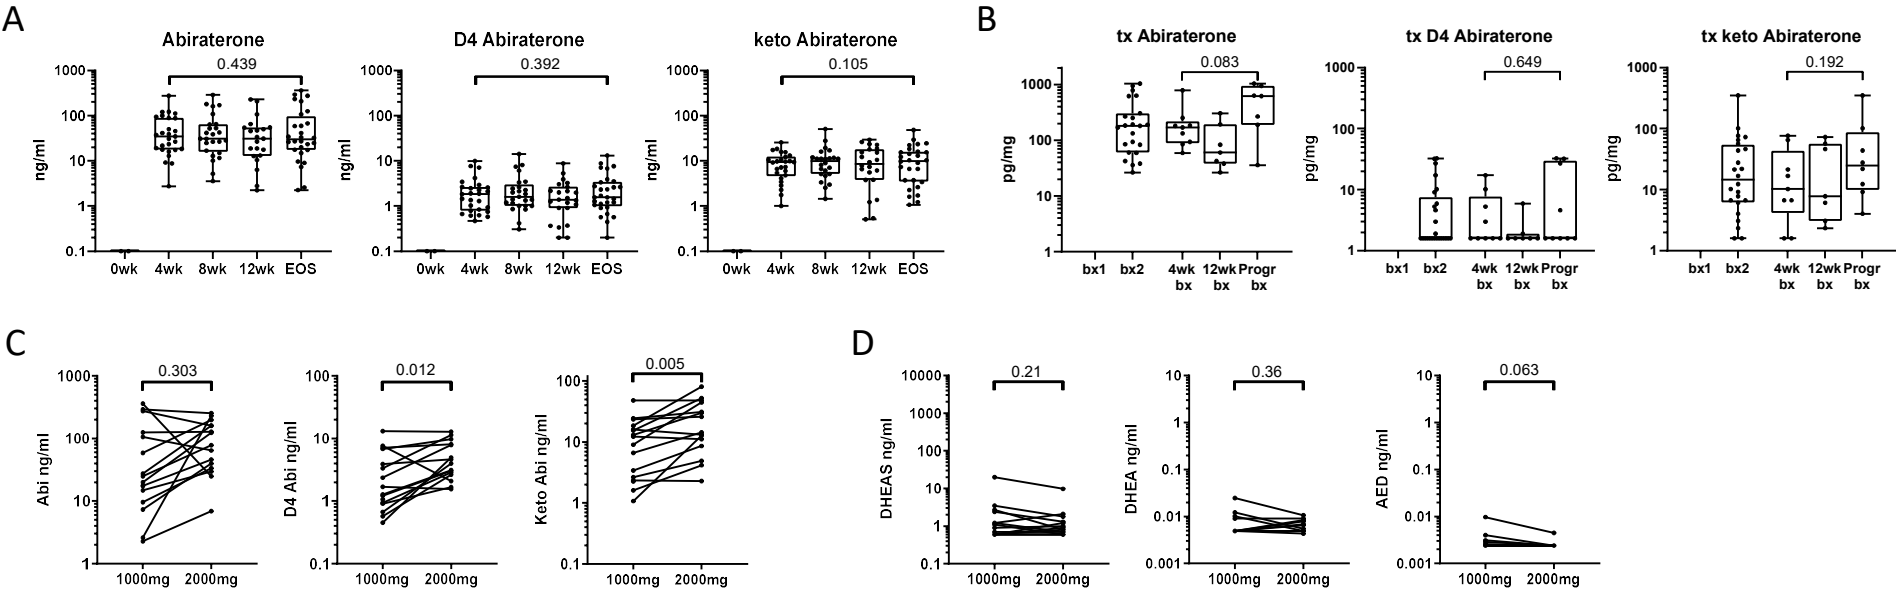

**Supplementary Figure 5. Serum and Tissue Levels of Abiraterone and Metabolites.** Change in levels of abiraterone, D4 abiraterone and 5 $\alpha$ -keto abiraterone in **A**. serum after standard dose abiraterone acetate at 4, 8 and 12 weeks (4wk, 8wk, 12wk) and at end of study (EOS) at the time of radiographic progression. **B**. Change in abiraterone and metabolite levels in metastatic tissue (tx) biopsies while on therapy (biopsy 2 – bx2). Biopsy 2 was taken at either 4 weeks (4wk bx), 12 weeks (12wk bx), or at progression (Progr bx). Dehydroepiandrosterone sulfate (DHEAS), dehydroepiandrosterone (DHEA), androstenedione (AED). Before and after plots of **C**. Abiraterone and metabolite levels, and **D**. serum DHEAS levels before and after escalation from 1000mg to 2000mg per day. P values for the indicated comparison calculated via paired two sample t tests. Data are shown as box and-whisker plots, where horizontal lines indicate median values; white boxes denote the 75th (upper margin) and 25th percentiles (lower margin), and upper and lower bars indicate the minimum and maximum values, respectively.

# Supplementary Figure 6. Associations of Serum and Tissue Abiraterone and Metabolite Levels

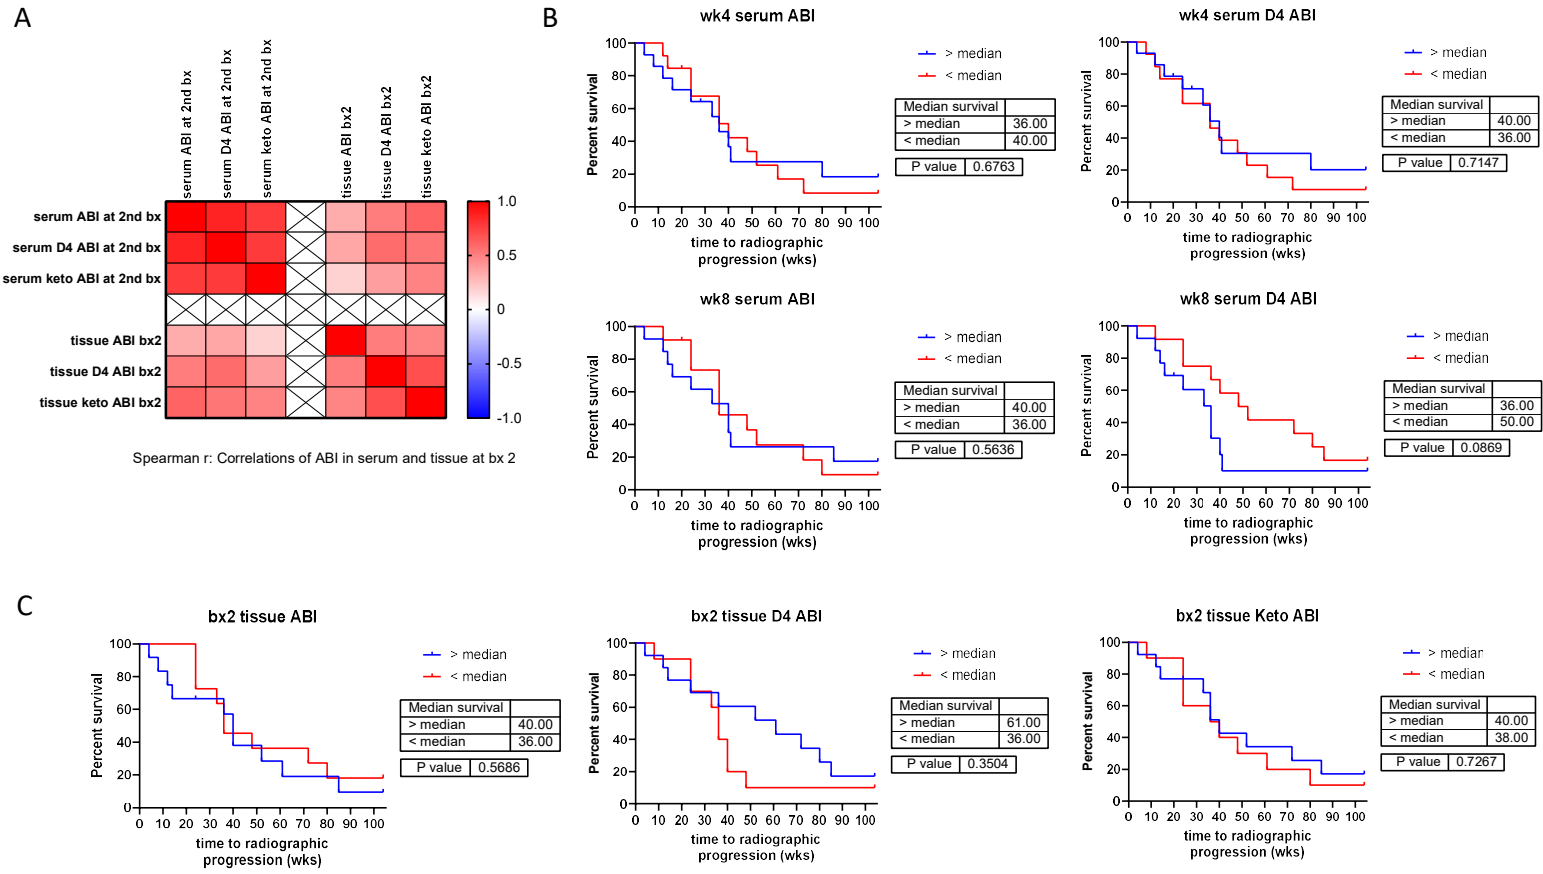

**Supplementary Figure 6. Associations of Serum and Tissue Abiraterone (ABI) and Metabolite Levels.** **A.** Heatmap of Spearman correlations in serum and tissue at time of second tissue biopsy (bx 2). **B.** Radiographic progression free survival (rPFS) as a function of serum ABI and D4-abiraterone levels (D4 ABI) at week 4 (wk4) and week 8 (wk8) comparing subjects above vs below the median. **C.** rPFS as a function of tissue abiraterone (ABI), D4 ABI, and Keto ABI levels at time of second biopsy (wk4 or wk12). Progression-free survival was estimated using Kaplan-Meier methods and compared using the Gehan-Wilcoxon test.

Supplementary Table 4. Tumor Genomic Alterations

| patient ID | Estimated % tumor content | PTEN       | MYC | TP53        | RB1 copy loss | BRCA2 | PIK3 | AR mutation/amp | TMPRSS2-ERG | other tumor genetic change                                | HSD3B1 genotype |
|------------|---------------------------|------------|-----|-------------|---------------|-------|------|-----------------|-------------|-----------------------------------------------------------|-----------------|
| 7639-05    | 4%                        |            |     |             |               |       |      |                 |             |                                                           | HTZ             |
| 7639-07    | 4%                        |            |     |             |               |       |      |                 |             |                                                           | HTZ             |
| 7639-09    | 4%                        |            |     |             |               |       |      |                 |             |                                                           | WT              |
| 7639-22    | 4%                        |            |     |             |               |       |      |                 |             | ATM M/?LOH                                                | WT              |
| 7639-16    | 4%                        |            |     | M/LOH       |               |       |      |                 |             | NOTCH1 HC CG; NF1 CL                                      | WT              |
| 7639-33    | 4%                        | BACL       |     | M/LOH       | CL            | CL    |      | A               |             | AKT A                                                     | WT              |
| 7639-10    | 5%                        | BA ex2 del |     |             | CL*           |       |      | M               |             | AR p.T878A; APC M; KDM6M; CHD1 CL*                        | HTZ             |
| 7639-23    | 10%                       | CL         |     |             |               |       | M    | A               | F           | PIK3CA M                                                  | WT              |
| 7639-11    | 15%                       | M/LOH      |     | M/LOH       |               |       | CG   |                 |             | PIK3CA/CB copy gain; PLK2 focal hom loss                  | WT              |
| 7639-31    | 35%                       |            |     |             |               |       | M    | M               | F           | AR p.W742L; PIK3CA M; MSI/MLH1 & hypermut; FOXA1 rearrang | HTZ             |
| 7639-01    | 40%                       | M          |     | M/?LOH      |               |       | M    | A               | F           | PIK3CA activating M; APC M, FLT4 M                        | MT              |
| 7639-15    | 45%                       | BACL       |     | M/?LOH      |               |       |      | M               | F           | AR p.W742C; EZH2 gain                                     | WT              |
| 7639-13    | 50%                       |            |     |             |               |       |      |                 | F           | CCND1 A; FOXA1 A; KDM6A M PLZF hom CL                     | MT              |
| 7639-18    | 55%                       |            |     | M/LOH       |               |       |      | A               | F           | BRIP1 rearrangement; KDM6A ex 3-6 del                     | HTZ             |
| 7639-03    | 60%                       | BACL       |     |             |               |       |      | M               | F           | APC M/LOH; AR p.T878A; ETV5 F                             | HTZ             |
| 7639-04    | 60%                       | BACL       |     | M/LOH       | CL*           |       |      | A               |             | BRIP1 rearrangement                                       | WT              |
| 7639-08    | 60%                       |            | A   |             |               |       |      | A               |             | ATM M/LOH/BA; MDM4 A; CCND1 A                             | HTZ             |
| 7639-20    | 60%                       |            | A   | M/LOH       |               | M/LOH |      |                 |             | BRAF CG                                                   | WT              |
| 7639-19    | 65%                       | BA ex1-7   |     | M/LOH       | CL            | CL    |      |                 |             | TET CG                                                    | MT              |
| 7639-27    | 65%                       |            |     |             | CL            |       |      | M               |             | AR p.H875Y; SPOP p.F133L M; CHDA M/LOH/BA; FOXA1 M        | MT              |
| 7639-30    | 65%                       |            | A   |             |               | BACL  |      |                 |             | SPOP p.F133V M, PLK2 & EPHA5 BACL                         | HTZ             |
| 7639-06    | 70%                       | BACL       |     | BACL        |               |       |      | A               | F           | NF1 exon 1-35 del                                         | WT              |
| 7639-32    | 70%                       |            |     |             |               |       |      |                 |             | ARID1A M                                                  | WT              |
| 7639-26    | 75%                       |            | A   | M/LOH       |               |       |      | A               |             | SPOP p.F133V; CHD1 BACL                                   | HTZ             |
| 7639-02    | 80%                       |            | A   | BA ex1-4del |               | BACL  |      |                 |             |                                                           | MT              |
| 7639-21    | 80%                       |            |     | CL          |               |       |      |                 |             | CDK12 M&TDS; CCND1 A; MDM4 A;                             | WT              |
| 7639-25    | 80%                       | BA ex2 del | A   |             |               |       |      | A               |             | CDK12 M&TDS; CCND1 A                                      | WT              |
| 7639-28    | 80%                       | BACL       |     | M/LOH       |               |       | M    | ex5-7 del       | F           | PIK3R1 M; GRIN2A M                                        | MT              |
| 7639-29    | 85%                       | BACL       | A   | M/LOH       | CL            | CL    |      |                 |             |                                                           | HTZ             |

A - Amplification; BACL - biallelic copy loss; CL\* - single vs double loss ambiguous; CG - copy gain; F - fusion; M - mutation; LOH - loss of heterozygosity  
 WT - wild type; MT - mutant; HTZ - heterozygous

Supplementary Figure 7. Association of Tumor Genomic Alterations with Survival and Androgen Levels

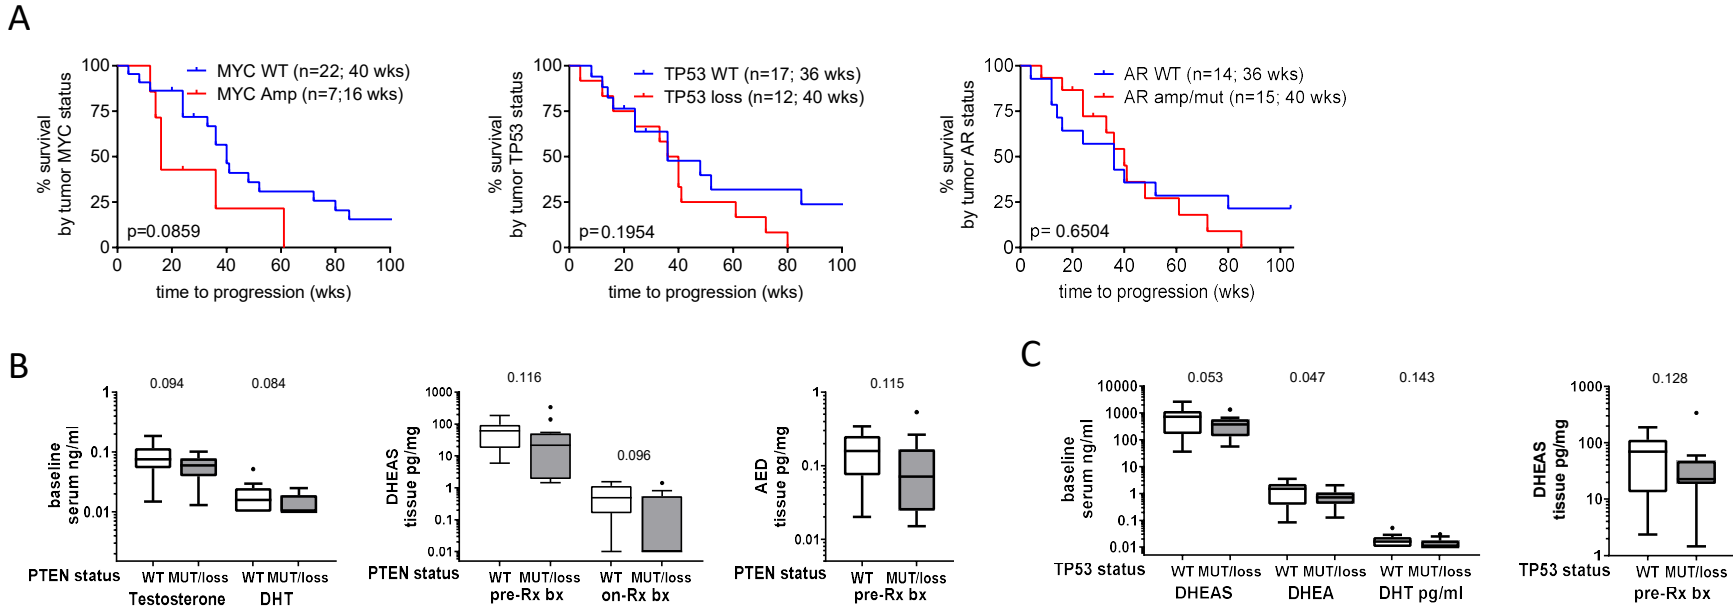

**Supplementary Figure 7. Association of Tumor Genomic Alterations with Survival and Androgen Levels.** **A.** Radiographic progression free survival (rPFS) as a function of MYC, TP53 or AR status. **B.** Comparison of pre-treatment levels of testosterone and DHT in serum, and of DHEAS and AED in metastatic tissue biopsies based on tumor PTEN status. **C.** Comparison of pre-treatment levels of DHEAS, DHEA and DHT in serum, and of DHEAS in metastatic tissue biopsies based on tumor TP53 status.

Supplementary Figure 8. Association of HSD3B1 Genotype with Androgens and Survival

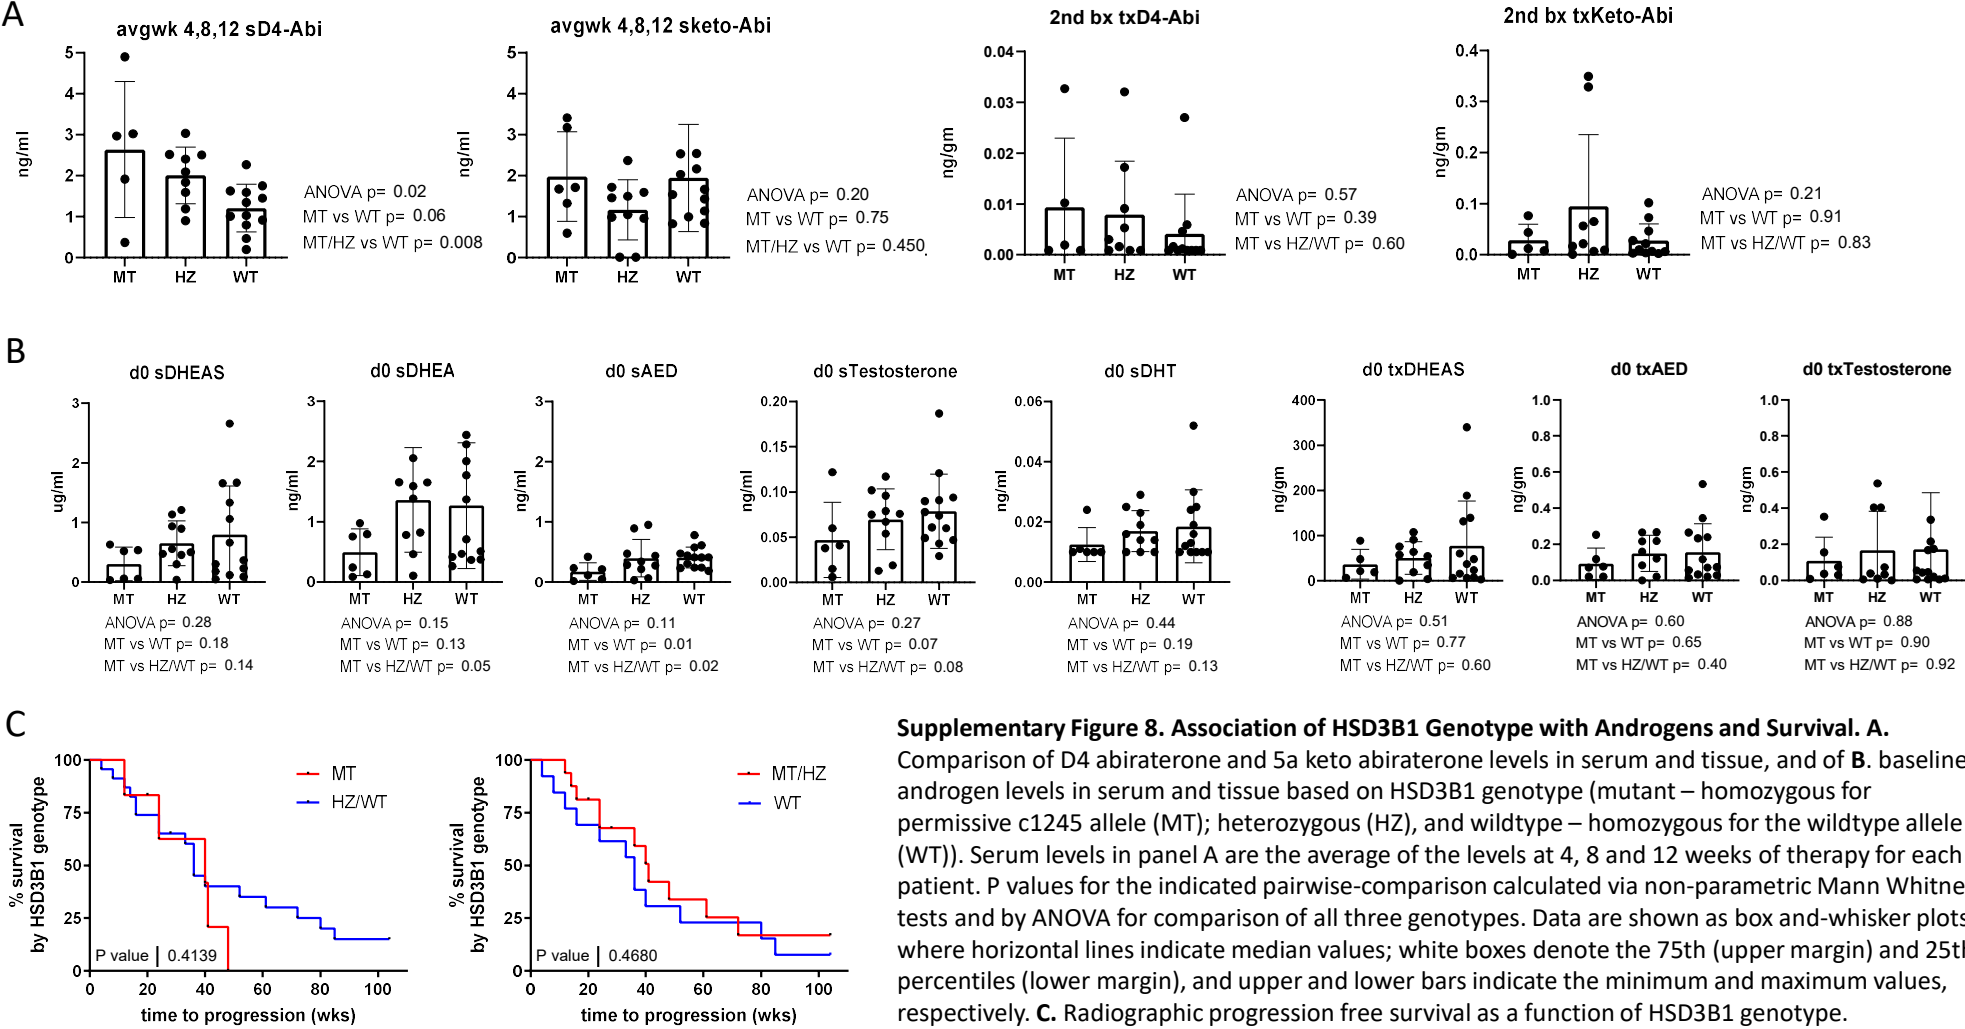

**Supplementary Figure 8. Association of HSD3B1 Genotype with Androgens and Survival. A.**

Comparison of D4 abiraterone and 5a keto abiraterone levels in serum and tissue, and of **B.** baseline androgen levels in serum and tissue based on HSD3B1 genotype (mutant – homozygous for permissive c1245 allele (MT); heterozygous (HZ), and wildtype – homozygous for the wildtype allele (WT)). Serum levels in panel A are the average of the levels at 4, 8 and 12 weeks of therapy for each patient. P values for the indicated pairwise-comparison calculated via non-parametric Mann Whitney tests and by ANOVA for comparison of all three genotypes. Data are shown as box and-whisker plots, where horizontal lines indicate median values; white boxes denote the 75th (upper margin) and 25th percentiles (lower margin), and upper and lower bars indicate the minimum and maximum values, respectively. **C.** Radiographic progression free survival as a function of HSD3B1 genotype.
